# Supplementary material for: Controlled electrodeposition of iron oxide/nickel oxide@Ni for the investigation of the effects of stoichiometry and particle size on energy storage and water splitting applications
Source: Royal Society of Chemistry journal article supplement (doi:10.1039/c8ta00795k), 2018-01-01
Supplement: c8ta00795k1.pdf [file c8ta00795k1.pdf]

## **Electronic Supplementary Information**

### **Controlled electrodeposition of Iron oxide/Nickel oxide@Ni for the investigation of the effect of stoichiometry and particle size on energy storage and water splitting application**

Sanjit Saha,<sup>ab</sup> J Sharath Kumar,<sup>ab</sup> Pranab Samanta,<sup>ab</sup> Naresh Chandra Murmu,<sup>ab</sup> Tapas  
Kuila<sup>\*ab</sup>

*<sup>a</sup> Surface Engineering & Tribology Division, CSIR-Central Mechanical Engineering  
Research Institute, Durgapur -713209, India*

*<sup>b</sup> Academy of Scientific and Innovative Research (AcSIR), CSIR-CMERI Campus, Durgapur-  
713209, India*

---

\*Correspondence to Tapas Kuila. Tel.: +91-3436510704; Fax: 91-343-2548204

E-mail address: [tkuila@gmail.com](mailto:tkuila@gmail.com) (Tapas Kuila)

---

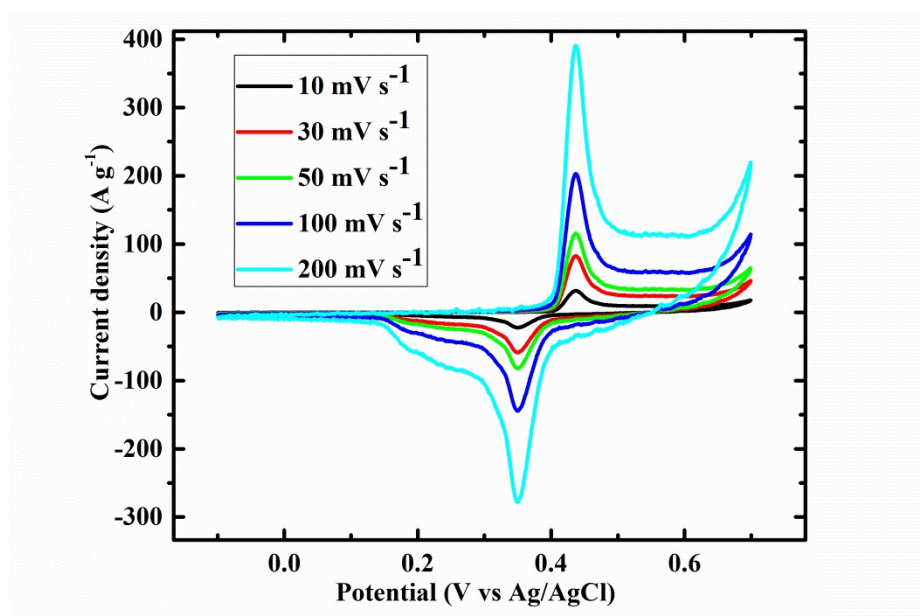

Figure 1 CV of MMO@NF0 at different scan rate

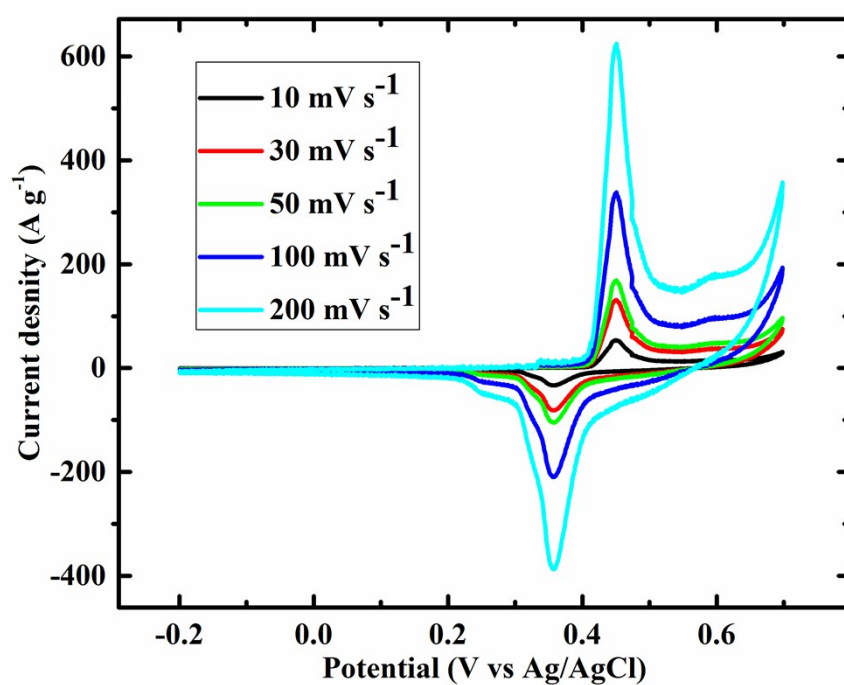

Figure 2 CV of MMO@NF1 at different scan rate

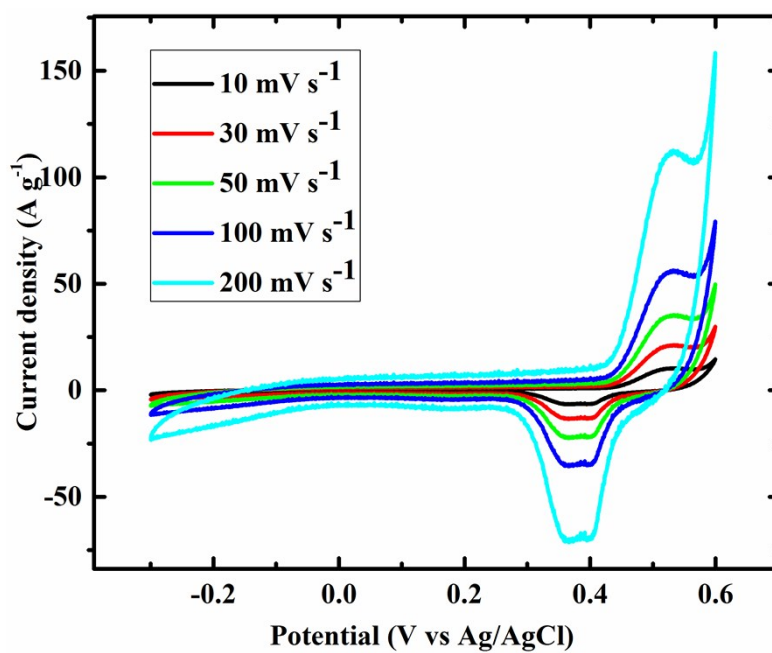

Figure 3 CV of MMO@NF2 at different scan rate

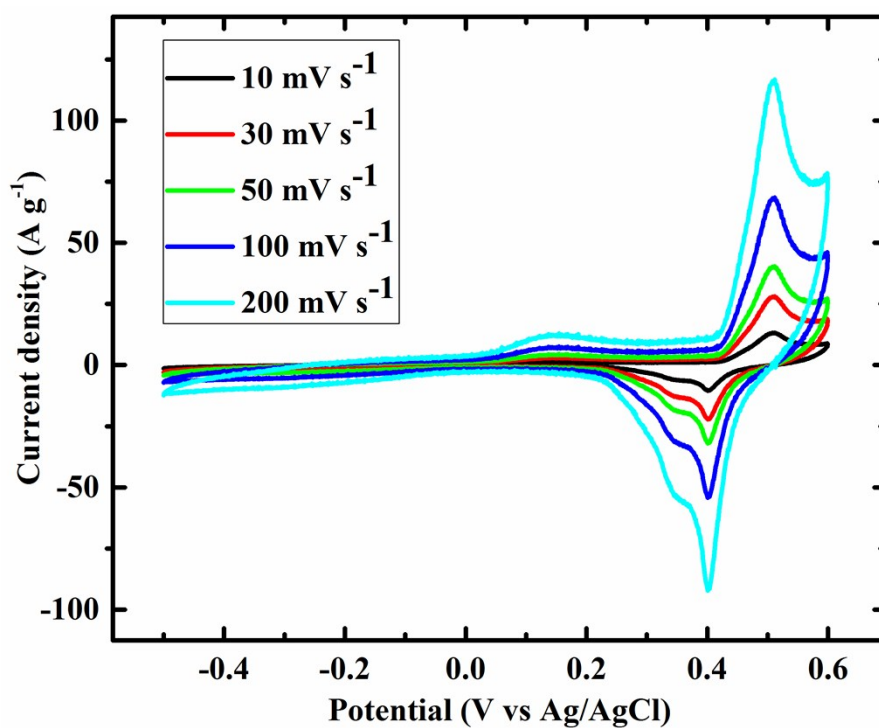

Figure 4 CV of MMO@NF3 at different scan rate

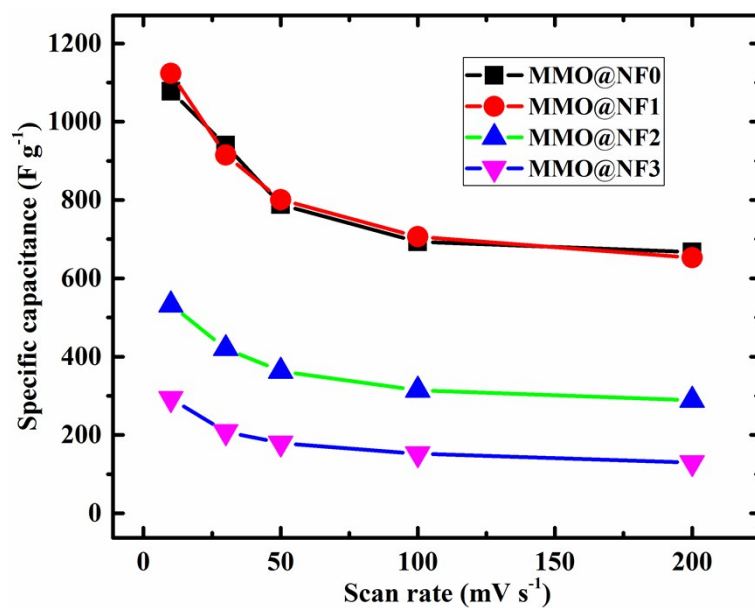

Figure 5 Variation of specific capacitance of MMO@NF0, MMO@NF1, MMO@NF2 and MMO@NF3 with scan rate

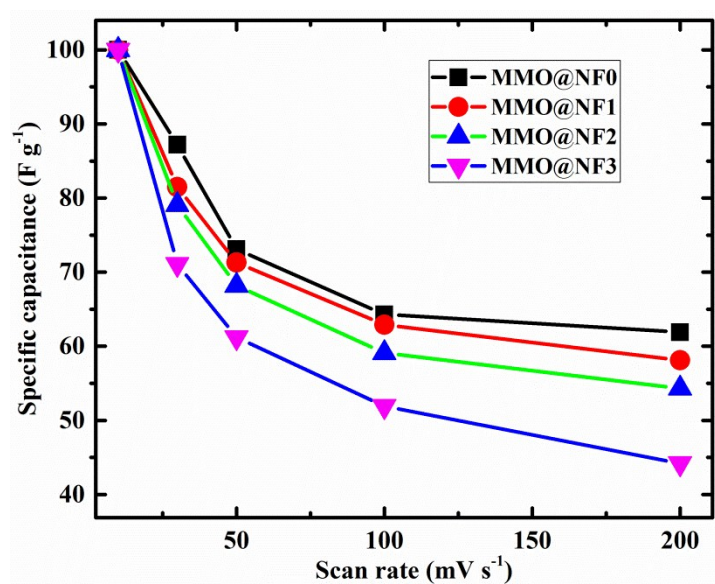

Figure 6 Retention of specific capacitance of MMO@NF0, MMO@NF1, MMO@NF2 and MMO@NF3 with scan rate

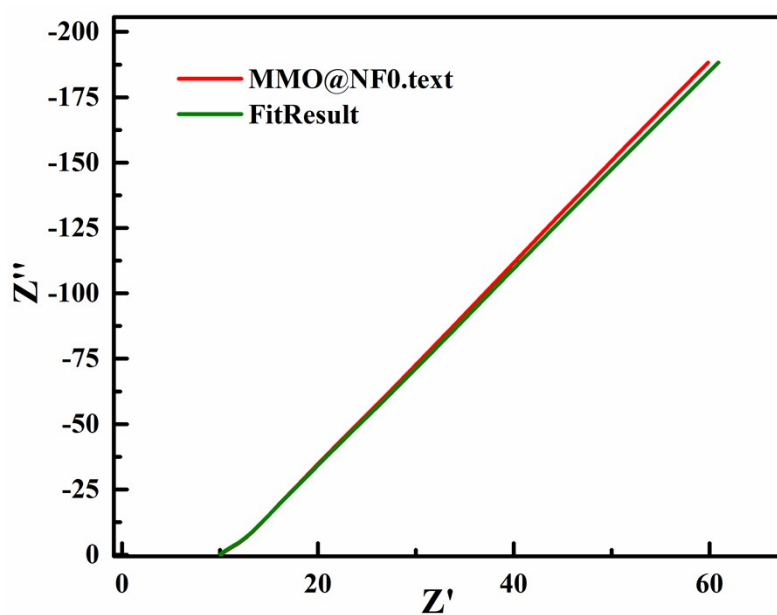

Figure 7 ZView fitted Nyquist plot of MMO@NF0 at different scan rate

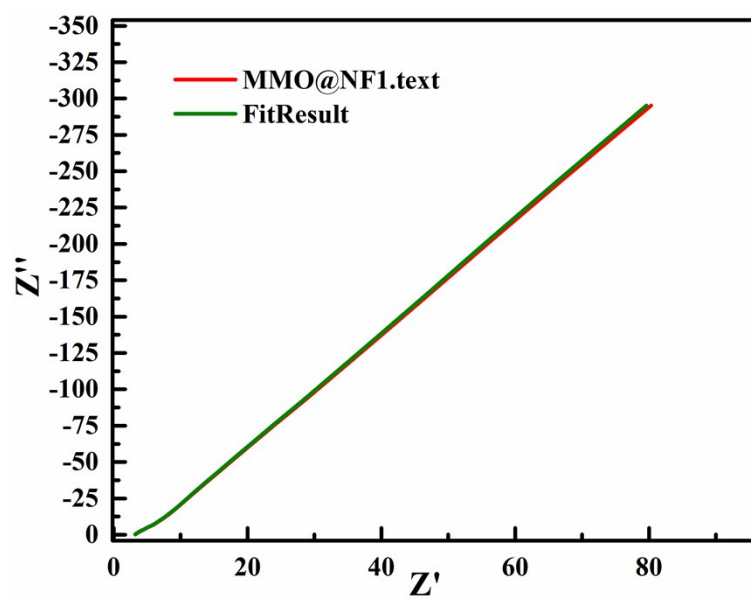

Figure 8 ZView fitted Nyquist plot of MMO@NF1 at different scan rate

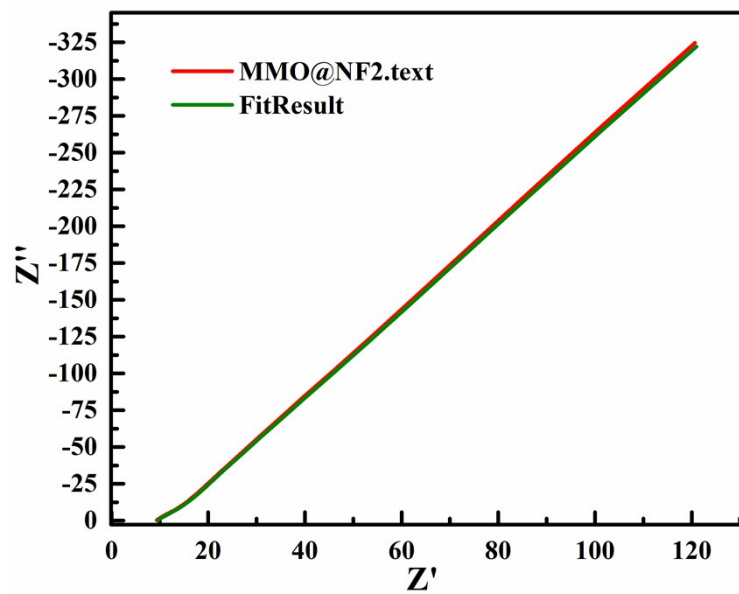

Figure 9 ZView fitted Nyquist plot of MMO@NF2 at different scan rate

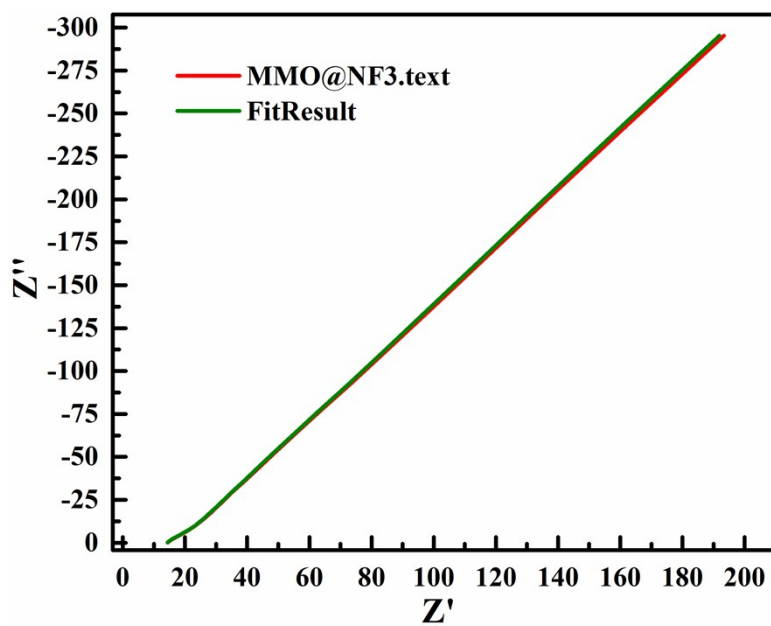

Figure 10 ZView fitted Nyquist plot of MMO@NF3 at different scan rate

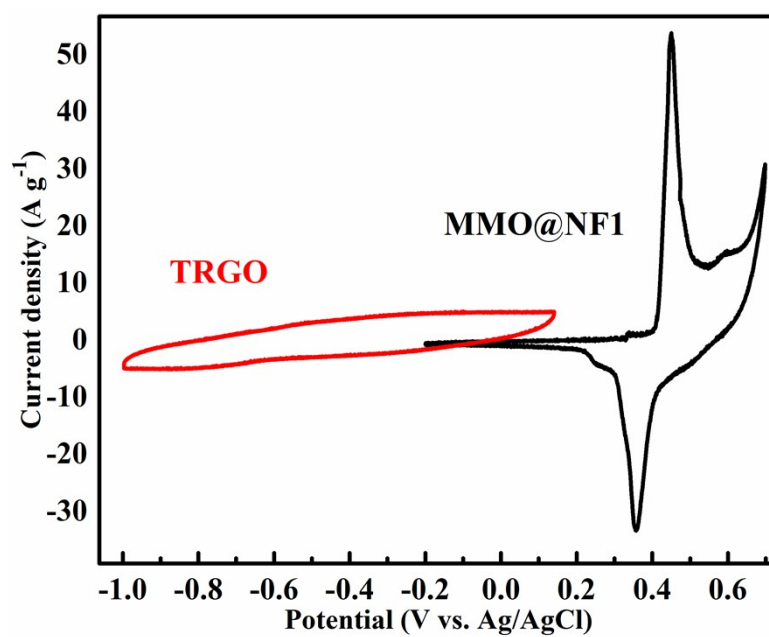

Figure 11 Comparison of the CV of MMO@NF1 and TRGO

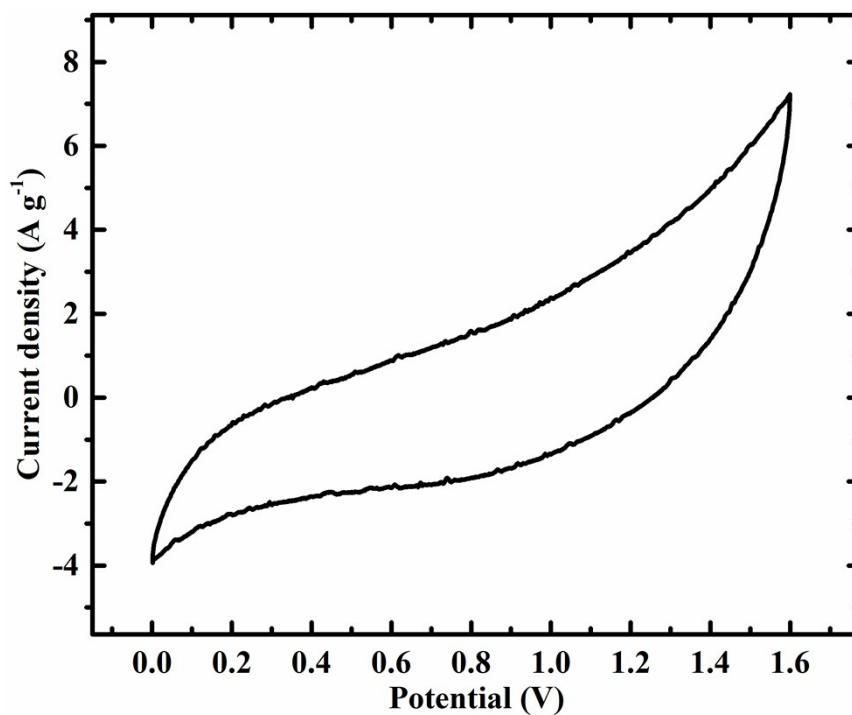

Figure 12 CV of ASC at  $10 \text{ mV s}^{-1}$  scan rate

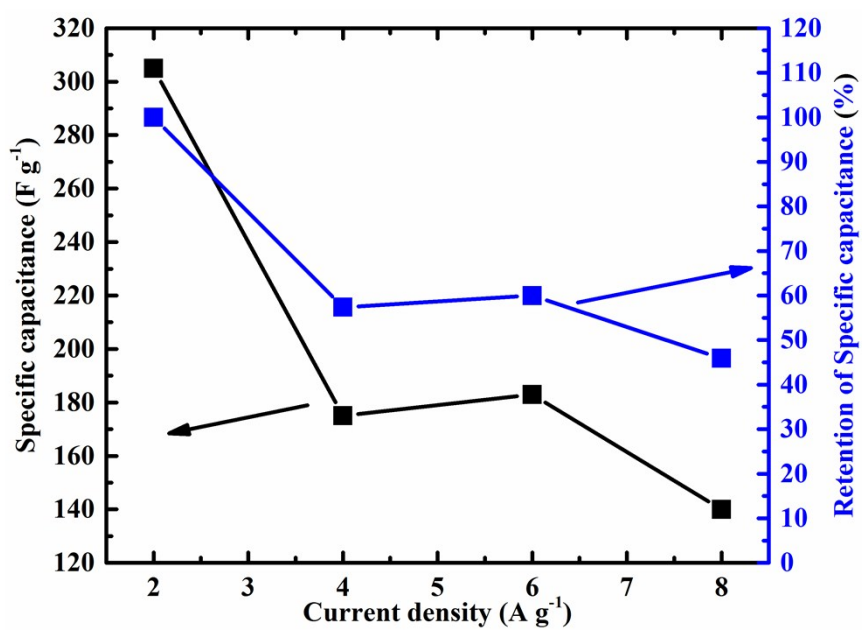

Figure 13 Variation and retention of the specific capacitance of ASC with different current density.
